# Supplementary material for: Exercise Improves Redox Homeostasis and Mitochondrial Function in White Adipose Tissue
Source: MDPI journal article supplement (doi:10.3390/antiox11091689), 2022-08-29
Supplement: s1 [file s1]

## SUPPLEMENTARY MATERIAL

**Supplementary Table S1.** *Forward and reverse sequences of primers.*

| GENE            | Acession Number | SPECIES                  | FORWARD                        | REVERSE                        |
|-----------------|-----------------|--------------------------|--------------------------------|--------------------------------|
| <i>Nox2</i>     | NM_023965.1     | <i>Rattus norvegicus</i> | <i>CCATTACACCATTCGCACATC</i>   | <i>CGAGTCACAGCCACATAC G</i>    |
| <i>Nox4</i>     | NM_053524.1     |                          | <i>TCCATCAAGCCAAGATTCTGAG</i>  | <i>GGTTTCCAGTCATCCAGTAGAG</i>  |
| <i>Cat</i>      | NM_012520.2     |                          | <i>CAAGCTGGTTAATGCGAATGG</i>   | <i>TTGAAAAGATCTCGGAGGCC</i>    |
| <i>Gpx1</i>     | NM_030826.4     |                          | <i>AATCAGTTCGGACATCAGGAG</i>   | <i>GAAGGTAAAGAGCGGGTGAG</i>    |
| <i>Gpx2</i>     | NM_183403.2     |                          | <i>GACACGAGGAAACCGAAGCA</i>    | <i>GGCCCTTCACAACGTCT</i>       |
| <i>Gpx3</i>     | NM_022525.4     |                          | <i>CAGCTACTGAGGTCTGACAG</i>    | <i>ACTAGGCAGGATCTCCGAG</i>     |
| <i>Sod1</i>     | NM_017050.1     |                          | <i>TGTGTCCATTGAAGATCGTGTG</i>  | <i>CTTCCAGCATTTCCAGTCTTTG</i>  |
| <i>Sod2</i>     | NM_017051.2     |                          | <i>GGACAAACCTGAGCCCTAAG</i>    | <i>CAAAAGACCCAAAGTCACGC</i>    |
| <i>Sod3</i>     | NM_012880.2     |                          | <i>GACCTGGAGATCTGGATGGA</i>    | <i>GTGGTTGGAGGTGTTCTGCT</i>    |
| <i>Nef2l2</i>   | NM_031789.3     |                          | <i>TTGTAGATGACCATGAGTCGC</i>   | <i>TGCCTGCTGTATGCTGCTT</i>     |
| <i>Hmox1</i>    | NM_012580.2     |                          | <i>ATCGTGCTCGCATGAACACT</i>    | <i>CAGCTCCTCAAAACAGCTCAATG</i> |
| <i>Gclm</i>     | NM_017305.2     |                          | <i>CAGTGGGCACAGGTAAAACC</i>    | <i>AATGCAGTCAAATCTGGTGGC</i>   |
| <i>Gclc1</i>    | NM_017305.2     |                          | <i>GGTGACGAGGTGGAGTACAT</i>    | <i>AACATCGCCGCCATTACAGTA</i>   |
| <i>Ppargc1a</i> | NM_031347.1     |                          | <i>CACCGCAATTCTCCCTTGTA</i>    | <i>TGCGGTATTCATCCCTCTTG</i>    |
| <i>Ppargc1b</i> | NM_176075.3     |                          | <i>TGCCACAACCCAACCACTCTCA</i>  | <i>AGCAGTCTCCAGCAGCCCAAAG</i>  |
| <i>Vegfa</i>    | NM_031836.3     |                          | <i>ACCACAGTCCATGCCATCAC</i>    | <i>TCCACCACCCTGTTGCTGTA</i>    |
| <i>Srebf1</i>   | NM_001276707.1  |                          | <i>GGAGCCATGGATTGCACATT</i>    | <i>GCTTCCAGAGAGGAGCCCAG</i>    |
| <i>Ppargc1a</i> | NM_031347.1     |                          | <i>GGTGAAACTCTGGGAGATCCTCC</i> | <i>AGCAACCATTGGGTCAGCTCT</i>   |
| <i>Il18</i>     | NM_031512.2     |                          | <i>GCAATGGTCGGGACATAGTT</i>    | <i>AGACCTGACTTGGCAGAGGA</i>    |
| <i>Il6</i>      | NM_012589.2     |                          | <i>TCTCTCCGCAAGAGACTTCCA</i>   | <i>ATACTGGTCTGTTGTGGG</i>      |
| <i>Tnf</i>      | NM_012589.2     |                          | <i>ACCACGCTCTTCTGTCTACTG</i>   | <i>CTTGGTGGTTTGCTACGAC</i>     |
| <i>Ccl2</i>     | NM_031530.1     |                          | <i>GTGCTGACCCCAATAAGGAA</i>    | <i>TGAGGTGGTTGTGGAAAAGA</i>    |
| <i>Cdkn2a</i>   | NM_031550.2     |                          | <i>TCCGAGAGGAAGGCGAACTC</i>    | <i>GCTGCCCTGGCTAGTCTATCTG</i>  |
| <i>Cdkn2d</i>   | NM_130812.4     |                          | <i>ACCCCAAGTGAGGGTTTCT</i>     | <i>GATCCTCTCTGGCCTCAACA</i>    |
| <i>Actb</i>     | NM_031144.3     |                          | <i>CAC TTTCTACAATGAGCTGCG</i>  | <i>CTGGATGGCTACGTACATGG</i>    |

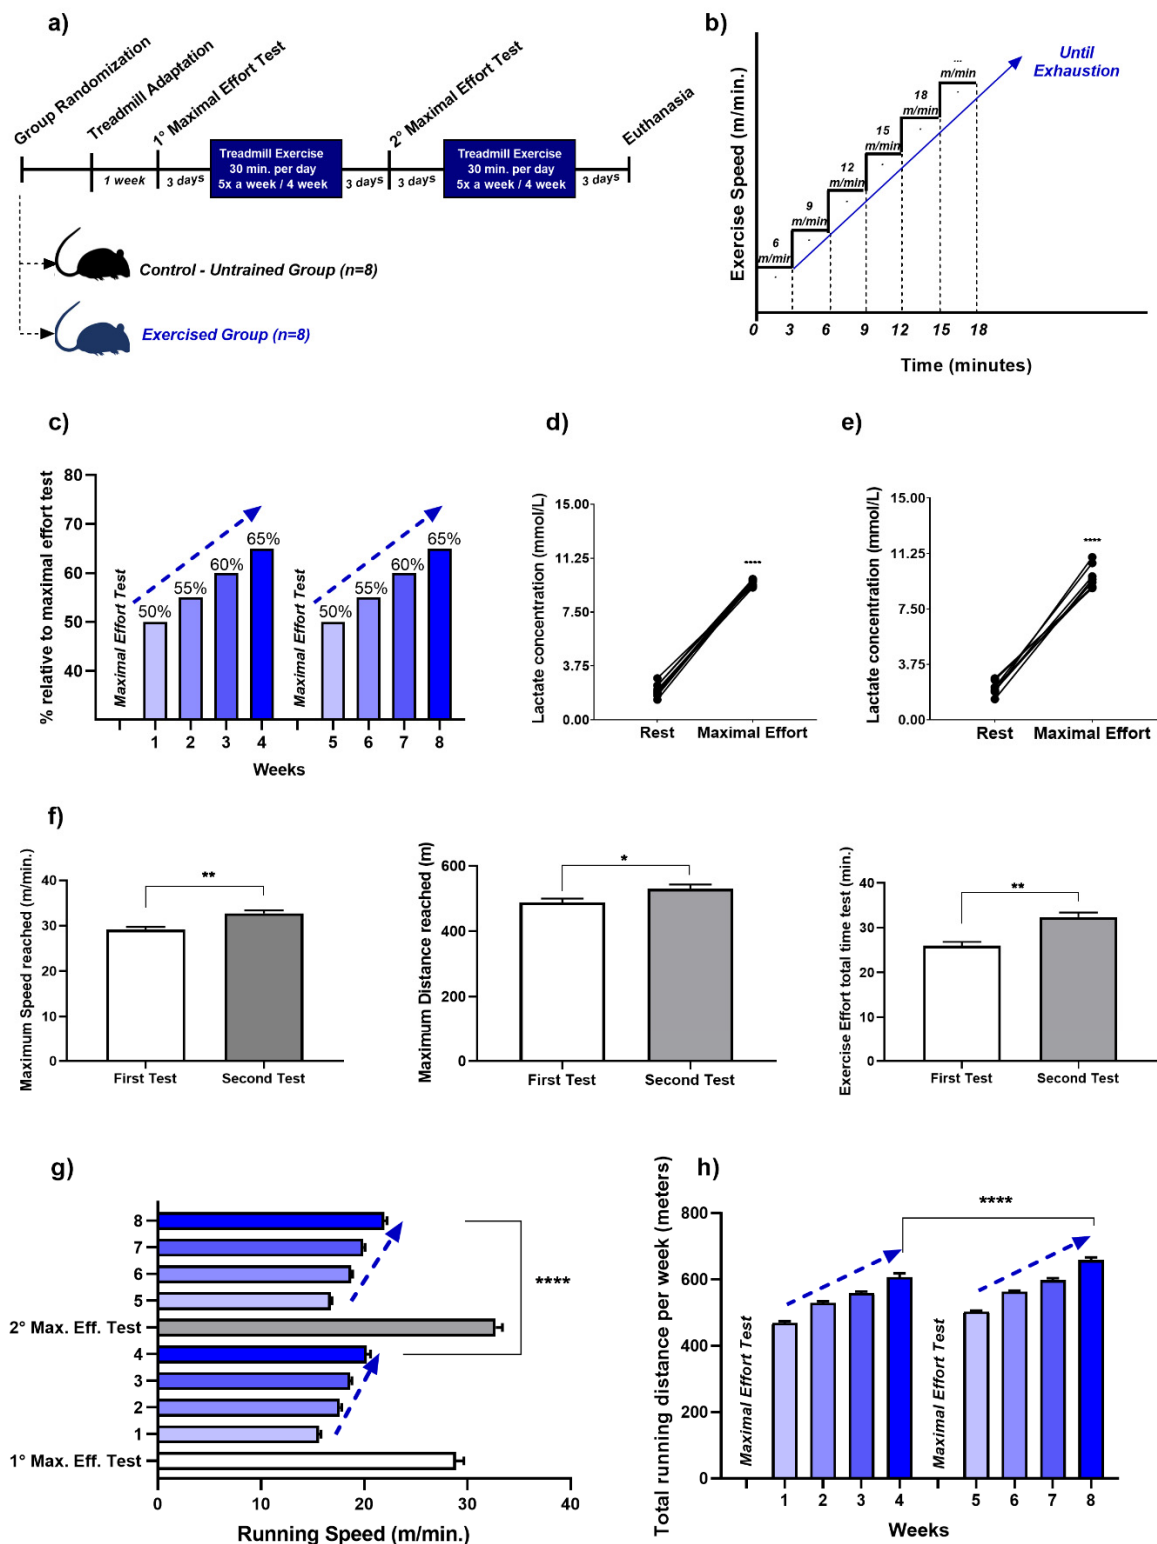

**Supplementary Figure S1. Experimental design to aerobic exercise capacity evaluation and periodization of the EX-group.** a) Timeline of interventions; b) Graphic representing the maximum speed test protocol; c) Progressive periodization model of aerobic training over the weeks; d) Lactate plasma concentration at rest and maximum post-first and second; e) maximal speed tests measured in plasma by spectrophotometry using the BioClin® Kit; f) Comparison between the physical performance of animals in the first and last test; g) Maximal speed reached in the 65% of the maximal capacity of AE program; h) Total running distance reached in the 65% of the maximal capacity of AE program. Data were expressed as the mean  $\pm$  standard error of the mean (n = 8/group). \*p<0.05; \*\*p<0.01; \*\*\*p<0.0001.
